# 1 **The Genome Sequence Archive Family: Towards Explosive Data**

## 2 **Growth and Diverse Data Types**

3

4 Tingting Chen<sup>1,2,#</sup>, Xu Chen<sup>1,2,#</sup>, Sisi Zhang<sup>1,2,#</sup>, Junwei Zhu<sup>1,2,#</sup>, Bixia Tang<sup>1,2</sup>, Anke  
5 Wang<sup>1,2</sup>, Lili Dong<sup>1,2</sup>, Zhewen Zhang<sup>1,2</sup>, Caixia Yu<sup>1,2</sup>, Yanling Sun<sup>1,2</sup>, Lianjiang Chi<sup>1,3</sup>,  
6 Huanxin Chen<sup>1,2</sup>, Shuang Zhai<sup>1,2</sup>, Yubin Sun<sup>1,2</sup>, Li Lan<sup>1,2</sup>, Xin Zhang<sup>1,2</sup>, Jingfa  
7 Xiao<sup>1,2,4</sup>, Yiming Bao<sup>1,2,4</sup>, Yanqing Wang<sup>1,2,\*</sup>, Zhang Zhang<sup>1,2,4,\*</sup>, Wenming Zhao<sup>1,2,4,\*</sup>

8

9

10 <sup>1</sup> *National Genomics Data Center, Beijing Institute of Genomics, Chinese Academy of*  
11 *Sciences / China National Center for Bioinformation, Beijing 100101, China*

12 <sup>2</sup> *CAS Key Laboratory of Genome Sciences and Information, Beijing Institute of*  
13 *Genomics, Chinese Academy of Sciences, Beijing100101, China*

14 <sup>3</sup> *CAS Key Laboratory of Genomic and Precision Medicine, Beijing Institute of*  
15 *Genomics, Chinese Academy of Sciences, Beijing 100101, China*

16 <sup>4</sup> *University of Chinese Academy of Sciences, Beijing 100049, China*

17

18 # Equal contribution.

19 \* Corresponding author(s).

20 E-mail: zhaowm@big.ac.cn (Zhao W), zhangzhang@big.ac.cn (Zhang Z),

21 wangyanqing@big.ac.cn (Wang Y).

22

23 **Running title:** *Chen T et al / The Genome Sequence Archive Family*

24

25

26

27 Total word counts (from “Introduction” to “Conclusions” or “Materials and  
28 methods”): 1728

29 Total figures: 2  
30 Total tables: 2  
31 Total supplementary figures: 0  
32 Total supplementary tables: 0  
33 Total supplementary files: 0

## 34 **Abstract**

35 The Genome Sequence Archive (GSA) is a data repository for archiving raw sequence  
36 data, which provides data storing and sharing services for worldwide scientific  
37 communities. Considering explosive data growth with diverse data types, here we  
38 present the GSA family by expanding into a set of resources for raw data archive with  
39 different purposes, namely, GSA (<https://ngdc.cncb.ac.cn/gsa/>), GSA for Human  
40 (GSA-Human, <https://ngdc.cncb.ac.cn/gsa-human/>), and  
41 Open Archive for Miscellaneous Data (OMIX, <https://ngdc.cncb.ac.cn/omix/>).  
42 Compared with the 2017 version, GSA has been significantly updated in data model,  
43 online functionalities, and web interfaces. GSA-Human, as a new partner of GSA, is a  
44 data repository specialized in human genetics-related data with controlled access and  
45 security. OMIX, as a critical complement to the two resources mentioned above, is an  
46 open archive for miscellaneous data. Together, all these resources form a family of  
47 resources dedicated to archiving explosive data with diverse types, accept data  
48 submissions from all over the world and provide free open access to all publicly  
49 available data in support of worldwide research activities.

50

51 **KEYWORDS:** Genome Sequence Archive; GSA; GSA-Human; OMIX

52

## 53 **Introduction**

54 The Genome Sequence Archive [1] (GSA, <https://ngdc.cncb.ac.cn/gsa>) is a public  
55 archive of raw sequence data in the National Genomics Data Center (NGDC) [2-4],  
56 part of the China National Center for Bioinformation (CNCB). GSA accepts  
57 worldwide data submissions, performs data curation and quality control for all  
58 submitted data, and provides free open access to all publicly available data without  
59 unnecessary restrictions. Since its inception in 2015, GSA has been broadly supported  
60 and endorsed by the scientific community, as testified by a total of 324,325  
61 experiments, 371,973 runs and 8526 TB files submitted by 1530 users from 385  
62 institutions and reported in 634 research articles and 239 scientific journals (as of  
63 June 2021). Importantly, GSA serves as one of the core resources in CNCB-NGDC  
64 that has stable state funding in biological data management, thus ensuring long-term  
65 persistence and preservation of submitted datasets.

66 Due to the rapid development of sequencing technologies towards higher  
67 throughput and lower cost as well as their wider applications in biomedical research, a  
68 large number of multi-omics data have been produced at ever-increasing rates and  
69 scales, provoking two major challenges for raw data management in GSA. For one  
70 thing, several large-scale sequencing projects (such as Earth BioGenome Project [5],  
71 Dog 10K Project [6], Protist 10000 Genomes Project [7] ) have been carried out over  
72 the past several years, leading to different types of raw sequence data generated  
73 around the global and accordingly requiring a suite of web services for massive data  
74 submission and deposition. For another, studies on human population genomics and  
75 precision medicine have produced millions of personal genome sequences associated  
76 with clinical information, requiring controlled access and security management,  
77 which is critically vital in promoting human healthcare and precise medical treatment  
78 and advancing big-data-driven scientific research, while protecting data privacy.  
79 These challenges are particularly crucial in China since it not only features the largest

80 population in the world and rich biodiversity resources, but also has a formidable  
81 capacity in genome sequencing throughout the country.

82 To address these challenges, here we provide a family of resources for raw data  
83 archive and management, including an updated version of GSA and two newly  
84 developed partner resources, namely, GSA for Human (GSA-Human,  
85 <https://ngdc.cncb.ac.cn/gsa-human>) and Open Archive for Miscellaneous Data  
86 (OMIX, <https://ngdc.cncb.ac.cn/omix>). Specially, we updated GSA with significant  
87 improvements on data model, online functionalities and web interfaces. As an  
88 important partner to GSA that provides open access to all released data, GSA-Human  
89 features controlled-access and security services for human genetics-related data,  
90 which is compatible well with the database of Genotypes and Phenotypes (dbGaP) [8]  
91 in the National Center for Biotechnology Information (NCBI) [9] and the European  
92 Genome-phenome Archive (EGA) [10] in the European Bioinformatics Institute  
93 (EBI) [11]. But GSA-human is different from dbGaP and EGA; the former is mainly  
94 used to archive and store raw sequence data, while the latter not only archive raw  
95 sequence data, but also archive phenotypic data. In addition, OMIX  
96 (<https://ngdc.cncb.ac.cn/omix/>), as a critical complement to the above two resources,  
97 is an open archive for miscellaneous data that are unsuitable to store in GSA,  
98 GSA-Human or other databases at CNCB-NGDC. Together, all these resources form  
99 a family of resources dedicated to archiving explosive data with diverse types.

## 100 **Archival resources**

101 GSA, built based on the INSDC (International Nucleotide Sequence Database  
102 Collaboration) [12] data standards and structures, is a public data repository for  
103 archiving raw sequence reads. Over the past several years, GSA has been frequently  
104 and considerably updated since its establishment in 2015, with significant  
105 improvements in data structure, online submission, quality control, and web  
106 functionalities (**Table 1**). First, data structure has been significantly changed (Figure  
107 1); BioProject (<https://ngdc.cncb.ac.cn/bioproject/>) and BioSample

108 (<https://ngdc.cncb.ac.cn/biosample/>) have been separated from GSA, serving as  
109 independent meta-information databases and acting as an organizational framework to  
110 provide centralized access to descriptive metadata about research projects and  
111 samples, respectively. Second, to help users submit massive data with different types,  
112 more sequencing platforms, sample types, and file formats were acceptable, and  
113 importantly, batch submission of multiple experiments and runs was enabled in the  
114 updated version of GSA. In addition, to provide users with convenient services for  
115 uploading raw sequence files, GSA not only provides an FTP server but also equips  
116 with Aspera (<https://www.ibm.com/products/aspera>) to realize high-speed data  
117 transmission. Third, GSA was greatly enhanced by improving the expert curation  
118 process and integrating an automated quality control pipeline, with the aim to provide  
119 value-added services for archiving high-quality data. Fourth, multiple web  
120 functionalities for bilingual support (both English and Chinese), online  
121 documentation, data statistics and visualization charts, were updated/newly added.  
122 Taken together, the updated version of GSA is more efficient and friendly in big  
123 omics-data submission, deposition and management.

124 GSA-Human, established in April 2018, is a data repository specialized in the  
125 secure management of human genetics-related data. It accepts submissions of various  
126 studies, including disease, cohort, cell line, clinical pathogen and human associated  
127 metagenome. GSA-Human uses the “individual” to organize its metadata and  
128 sequence reads and provides two different data access mechanisms: open access and  
129 controlled-access. Open access means that all data are public for global researchers,  
130 whereas controlled-access means that data can be downloadable only after being  
131 authorized by the Data Access Committee (DAC) that is responsible for  
132 authorizing/declining data access to data requester. Therefore, GSA-Human provides  
133 a series of data services including access control, data request, access  
134 authorization/decline, and security management.

135 OMIX, as a new member of the archival resources in CNCB-NGDC, aims to meet  
136 users' needs for submitting various types of data other than sequences. It collects not  
137 only raw data from transcriptome, epigenome, and microarray, but also functional  
138 data such as lipidome, metabolome, proteome, and even data like clinical information,  
139 demographic data, questionnaire and so on. With the concise interface and simplified  
140 submission process, OMIX enables data submission and deposition very easy. Of  
141 note, similar to GSA-Human, OMIX has a data security management strategy for  
142 human genetic data. Any controlled-access dataset in OMIX can be accessed only  
143 with the permission of the original data submitter/owner.

#### 144 **Data submission and retrieval**

145 Data submission to the GSA family is aided by a series of web services, including  
146 BIG Single Sign-On (SSO; <https://ngdc.cncb.ac.cn/sso/>) that is a user access control  
147 system and BIG Submission portal (BIG Sub; <https://ngdc.cncb.ac.cn/gsub/>) that is a  
148 unified one-stop portal providing submission services for a variety of database  
149 resources in CNCB-NGDC. To submit data to the GSA family, user needs to register  
150 an account and log into any database via SSO that can help user gain access to  
151 multiple independent systems with a single ID and password.

152 Overall, the GSA family provides a suite of services for data retrieval, download  
153 and access. Public data in these resources can be retrieved via BIG Search  
154 (<https://ngdc.cncb.ac.cn/search/>), a scalable text search engine that performs more  
155 powerful data retrieval and analytical capabilities. All released data are publicly  
156 accessible and downloadable via FTP and HTTP, but controlled data in GSA-Human  
157 and OMIX require access permission. To access the controlled data, requester needs  
158 to create a request and send required documents for data access. Once the request has  
159 been reviewed and approved, the requester gains the access to the data.

#### 160 **Data statistics**

161 The GSA family has received a large number of data submissions with explosive  
162 growth in data and users, thus exhibiting their important roles in raw data

163 management (**Figure 1** and **Table 2**). The volume of archived data has increased by  
164 more than 40 times, compared to the 200 TB archived in the previous release of GSA  
165 [1]. Till June 2021, GSA and GSA-Human have collected 324,325 Experiments,  
166 371,973 Runs and more than 8.5 PB of data submitted from 1530 submitters of 385  
167 organizations (Figure 2A). In particular, GSA-Human has archived 61,225 individuals  
168 and housed 4.9 PB of raw sequence data within less than one year, clearly showing  
169 that human genetic data are growing at an unprecedented rate and scale. More  
170 importantly, GSA-Human has received a total of 721 access requests from 485  
171 requesters, with 178 requests approved till June 2021. Regarding the trend of archived  
172 data over time, it is observed that it took about three years to accumulate the first PB  
173 of data and currently reaches to 8.5 PB in just over two and a half years, with a  
174 formidably dramatic decrease in days for data accumulation (Figure 2B). Strikingly,  
175 the third PB volume took only 30 days, principally contributed by a large-scale  
176 sequencing project [13] with 344 TB of data archived. Meanwhile, the number of  
177 species involved is also on a rapid increase, from 80 in December 2016 to more than  
178 1000 at present. Also, albeit newly established, OMIX has collected 160 files of 801  
179 GB.

180 Currently, the GSA family has more than 5377 registered users and has been  
181 visited by 648,274 unique IPs from 111 countries/regions, with a total of 35,010,529  
182 page views and an average of 4 TB of downloads per day. Data housed in these  
183 resources have been reported in more than 239 scientific  
184 journals(<https://ngdc.cncb.ac.cn/gsa/statistics?active=journals>), including Cell,  
185 Genome Research, Genomics Proteomics Bioinformatics, Nature, Plant Cell and  
186 PNAS. More importantly, with frequent updates and improvements in the past several  
187 years, GSA has been recognized as one of the certified repositories in  
188 FAIRsharing.org and re3data.org, and therefore meets the requirement as a supported  
189 repository by Elsevier, Taylor & Francis, and Wiley. More detailed statistics can be  
190 found online at <https://ngdc.cncb.ac.cn/gsa/standards>.

191 **Future directions**

192 The explosive volume of raw data submitted to the GSA family is still on the increase,  
193 posing significant challenges to handle and share such big data [14]. Nowadays,  
194 CNCB-NGDC, hosting a suite of database resources including the GSA family, is  
195 going to be enhanced by national big data infrastructure, with stable governmental  
196 funding investment in upgrading storage, computing and network resources, thus  
197 providing fundamental support in raw data archive and management of the GSA  
198 family. In addition, our future efforts will be made in continuous optimization of data  
199 models and curation processes in evolution of users' needs, establishment of cloud  
200 infrastructure for big data storage, and development of a variety of tools to facilitate  
201 big data submission and high-speed transfer. To make effective use of human genetic  
202 data and promote precision healthcare and treatment, efforts will also be devoted to  
203 optimizing procedures and mechanisms to enable data sharing with controlled access  
204 and security by conforming to applicable regulations and ethical norms. We also  
205 advocate worldwide collaborations in developing data standards, tools and approaches  
206 towards global biodiversity & health big data sharing (BHBD alliance;  
207 <http://bhbd-alliance.org/>).

208 **CRedit author statement**

209 Tingting Chen: Investigation, Methodology, Data Curation, Writing - Original Draft.  
210 Xu Chen: Software. Sisi Zhang: Investigation, Methodology, Data Curation, Writing -  
211 Original Draft. Junwei Zhu: Software. Bixia Tang: Software. Anke Wang: Writing -  
212 Original Draft, Software. Lili Dong: Data Curation. Zhewen Zhang: Data Curation.  
213 Caixia Yu: Data Curation. Yanling Sun: Data Curation. Lianjiang Chi: Software.  
214 Huanxin Chen: Resources. Shuang Zhai: Resources. Yubin Sun: Resources. Li Lan:  
215 Resources. Xin Zhang: Resources. Jingfa Xiao: Writing - Review & Editing. Yiming  
216 Bao: Conceptualization, Writing - Review & Editing, Funding acquisition. Yanqing  
217 Wang: Conceptualization, Investigation, Methodology, Software, Writing - Review &  
218 Editing, Project administration. Zhang Zhang: Conceptualization, Writing - Review &



219 Editing, Funding acquisition. Wenming Zhao: Conceptualization, Methodology,  
220 Writing - Review & Editing, Supervision, Funding acquisition.

## 221 **Competing interests**

222 The authors have declared no competing interests.

## 223 **Acknowledgments**

224 We sincerely thank Prof. Jingchu Luo and Prof. Weimin Zhu for their valuable  
225 suggestions and a number of users for their contributions to the data submission. We  
226 also thank Changrui Feng and Zhuojing Fan for their assistance in drawing the figures  
227 of the manuscript. This work was supported by grants from Strategic Priority  
228 Research Program of Chinese Academy of Sciences [XDB38060100 and  
229 XDB38030200 to Y.B.; XDB38050300 to W.Z.; XDB38030400 to J.X.;  
230 XDA19050302 to Z.Z.]; National Key Research and Development Program of China  
231 [2016YFC0901603 to W.Z.; 2017YFC1201202 to Y.W.; 2020YFC0847000 and  
232 2018YFD1000505 to W.Z.; 2016YFE0206600 to Y.B.; 2017YFC0907502 to Z.Z.];  
233 The 13th Five-year Informatization Plan of Chinese Academy of Sciences  
234 [XXH13505-05 to Y.B.]; Genomics Data Center Construction of Chinese Academy of  
235 Sciences [XXH-13514-0202 to Y.B.]; Open Biodiversity and Health Big Data  
236 Programme of IUBS [to Y.B.]; The Professional Association of the Alliance of  
237 International Science Organizations [ANSO-PA-2020-07 to Y.B.]; National Natural  
238 Science Foundation of China [32030021 and 31871328 to Z.Z.]; International  
239 Partnership Program of the Chinese Academy of Sciences [153F11KYSB20160008 to  
240 Z.Z.].

## 241 **ORCID**

242 ORCID: 0000-0003-1296-3093 (Tingting Chen)

243 ORCID: 0000-0001-6102-1751 (Xu Chen)

244 ORCID: 0000-0002-3852-4796 (Sisi Zhang)

245 ORCID: 0000-0003-4689-3513 (Junwei Zhu)

- 246 ORCID: 0000-0002-9357-4411 (Bixia Tang)
- 247 ORCID: 0000-0002-2565-2334 (Anke Wang)
- 248 ORCID: 0000-0003-0953-6306 (Lili Dong)
- 249 ORCID: 0000-0002-9422-822X (Zhewen Zhang)
- 250 ORCID: 0000-0002-3882-9979 (Caixia Yu)
- 251 ORCID: 0000-0002-3175-3625 (Yanling Sun)
- 252 ORCID: 0000-0003-4836-0577 (Lianjiang Chi)
- 253 ORCID: 0000-0003-1293-4495 (Huanxin Chen)
- 254 ORCID: 0000-0002-2084-7132 (Shuang Zhai)
- 255 ORCID: 0000-0003-3810-7156 (Yubin Sun)
- 256 ORCID: 0000-0002-4761-2245 (Li Lan)
- 257 ORCID: 0000-0002-2300-1036 (Xin Zhang)
- 258 ORCID: 0000-0002-2835-4340 (Jingfa Xiao)
- 259 ORCID: 0000-0002-9922-9723 (Yiming Bao)
- 260 ORCID: 0000-0002-7985-7941 (Yanqing Wang)
- 261 ORCID: 0000-0001-6603-5060 (Zhang Zhang)
- 262 ORCID: 0000-0002-4396-8287 (Wenming Zhao)
- 263

264 **References**

- 265 [1] Wang Y, Song F, Zhu J, Zhang S, Yang Y, Chen T, et al. GSA: Genome Sequence  
266 Archive. *Genomics Proteomics Bioinformatics* 2017;15:14–8.
- 267 [2] Song S, Zhang Z. Database Resources in BIG Data Center: Submission,  
268 Archiving, and Integration of Big Data in Plant Science. *Mol Plant* 2019;12:279–81.
- 269 [3] National Genomics Data Center Members and Partners. Database Resources of the  
270 National Genomics Data Center in 2020. *Nucleic Acids Res* 2020;48:D24–D33.
- 271 [4] CNGB-NGDC Members & Partners. Database Resources of the National  
272 Genomics Data Center, China National Center for Bioinformation in 2021. *Nucleic*  
273 *Acids Res* 2021;49:D18–D28.
- 274 [5] Lewin HA, Robinson GE, Kress WJ, Baker WJ, Coddington J, Crandall KA, et al.  
275 Earth BioGenome Project: Sequencing life for the future of life. *Proc Natl Acad Sci U*  
276 *S A* 2018;115:4325–33.
- 277 [6] Tang B, Zhou Q, Dong L, Li W, Zhang X, Lan L, et al. iDog: an integrated  
278 resource for domestic dogs and wild canids. *Nucleic Acids Res* 2019;47:D793–D800.
- 279 [7] Miao W, Song L, Ba S, Zhang L, Guan G, Zhang Z, et al. Protist 10,000 Genomes  
280 Project. *The Innovation* 2020;1.
- 281 [8] Tryka KA, Hao L, Sturcke A, Jin Y, Wang ZY, Ziyabari L, et al. NCBI's Database  
282 of Genotypes and Phenotypes: dbGaP. *Nucleic Acids Res* 2014;42:D975–9.
- 283 [9] Sayers EW, Beck J, Bolton EE, Bourexis D, Brister JR, Canese K, et al. Database  
284 resources of the National Center for Biotechnology Information. *Nucleic Acids Res*  
285 2021;49:D10–D7.
- 286 [10] Lappalainen I, Almeida-King J, Kumanduri V, Senf A, Spalding JD, Ur-Rehman  
287 S, et al. The European Genome-phenome Archive of human data consented for  
288 biomedical research. *Nat Genet* 2015;47:692–5.
- 289 [11] Cantelli G, Cochrane G, Brooksbank C, McDonagh E, Flicek P, McEntyre J, et  
290 al. The European Bioinformatics Institute: empowering cooperation in response to a  
291 global health crisis. *Nucleic Acids Res* 2021;49:D29–D37.
- 292 [12] Cochrane G, Karsch-Mizrachi I, Takagi T, International Nucleotide Sequence  
293 Database Collaboration. The international nucleotide sequence database collaboration.  
294 *Nucleic Acids Res* 2016;44:D48–50.
- 295 [13] Li J, Xu C, Lee HJ, Ren S, Zi X, Zhang Z, et al. A genomic and epigenomic atlas  
296 of prostate cancer in Asian populations. *Nature* 2020;580:93–9.
- 297 [14] Zhang Z, Song S, Yu J, Zhao W, Xiao J, Bao Y. The elements of data sharing.  
298 *Genomics Proteomics Bioinformatics* 2020;18:1–4.

299

300

301 **Figure legends**

302 **Figure 1 Data model of the GSA family**

303 GSA data structure has been significantly changed. BioProject and BioSample have  
304 been separated from GSA, serving as independent meta-information databases and  
305 acting as an organizational framework to provide centralized access to descriptive  
306 metadata about research projects and samples, respectively. GSA-Human is used to  
307 archive human genetic resources data and OMIX is used for various non-sequencing  
308 types of data management.

309

310 **Figure 2 Data statistics of the GSA family**

311 **A.** Number of runs accumulated from 2016 to 2021, with five major species indicated.

312 **B.** Trend of submitted data volume in association with days involved. All statistics  
313 were derived from GSA and GSA-Human as of June 2021.

314

315 **Tables**

316 **Table 1 Comparison between GSA in 2017 and the GSA family in 2021**

317 **Table 2 Data items of the GSA family**

# BioProject

## BioSample

bioRxiv preprint doi: <https://doi.org/10.1101/2021.06.29.449849>; this version posted July 1, 2021. The copyright holder for this preprint (which was not certified by peer review) is the author/funder, who has granted bioRxiv a license to display the preprint in perpetuity. It is made available under aCC-BY-NC-ND 4.0 International license.

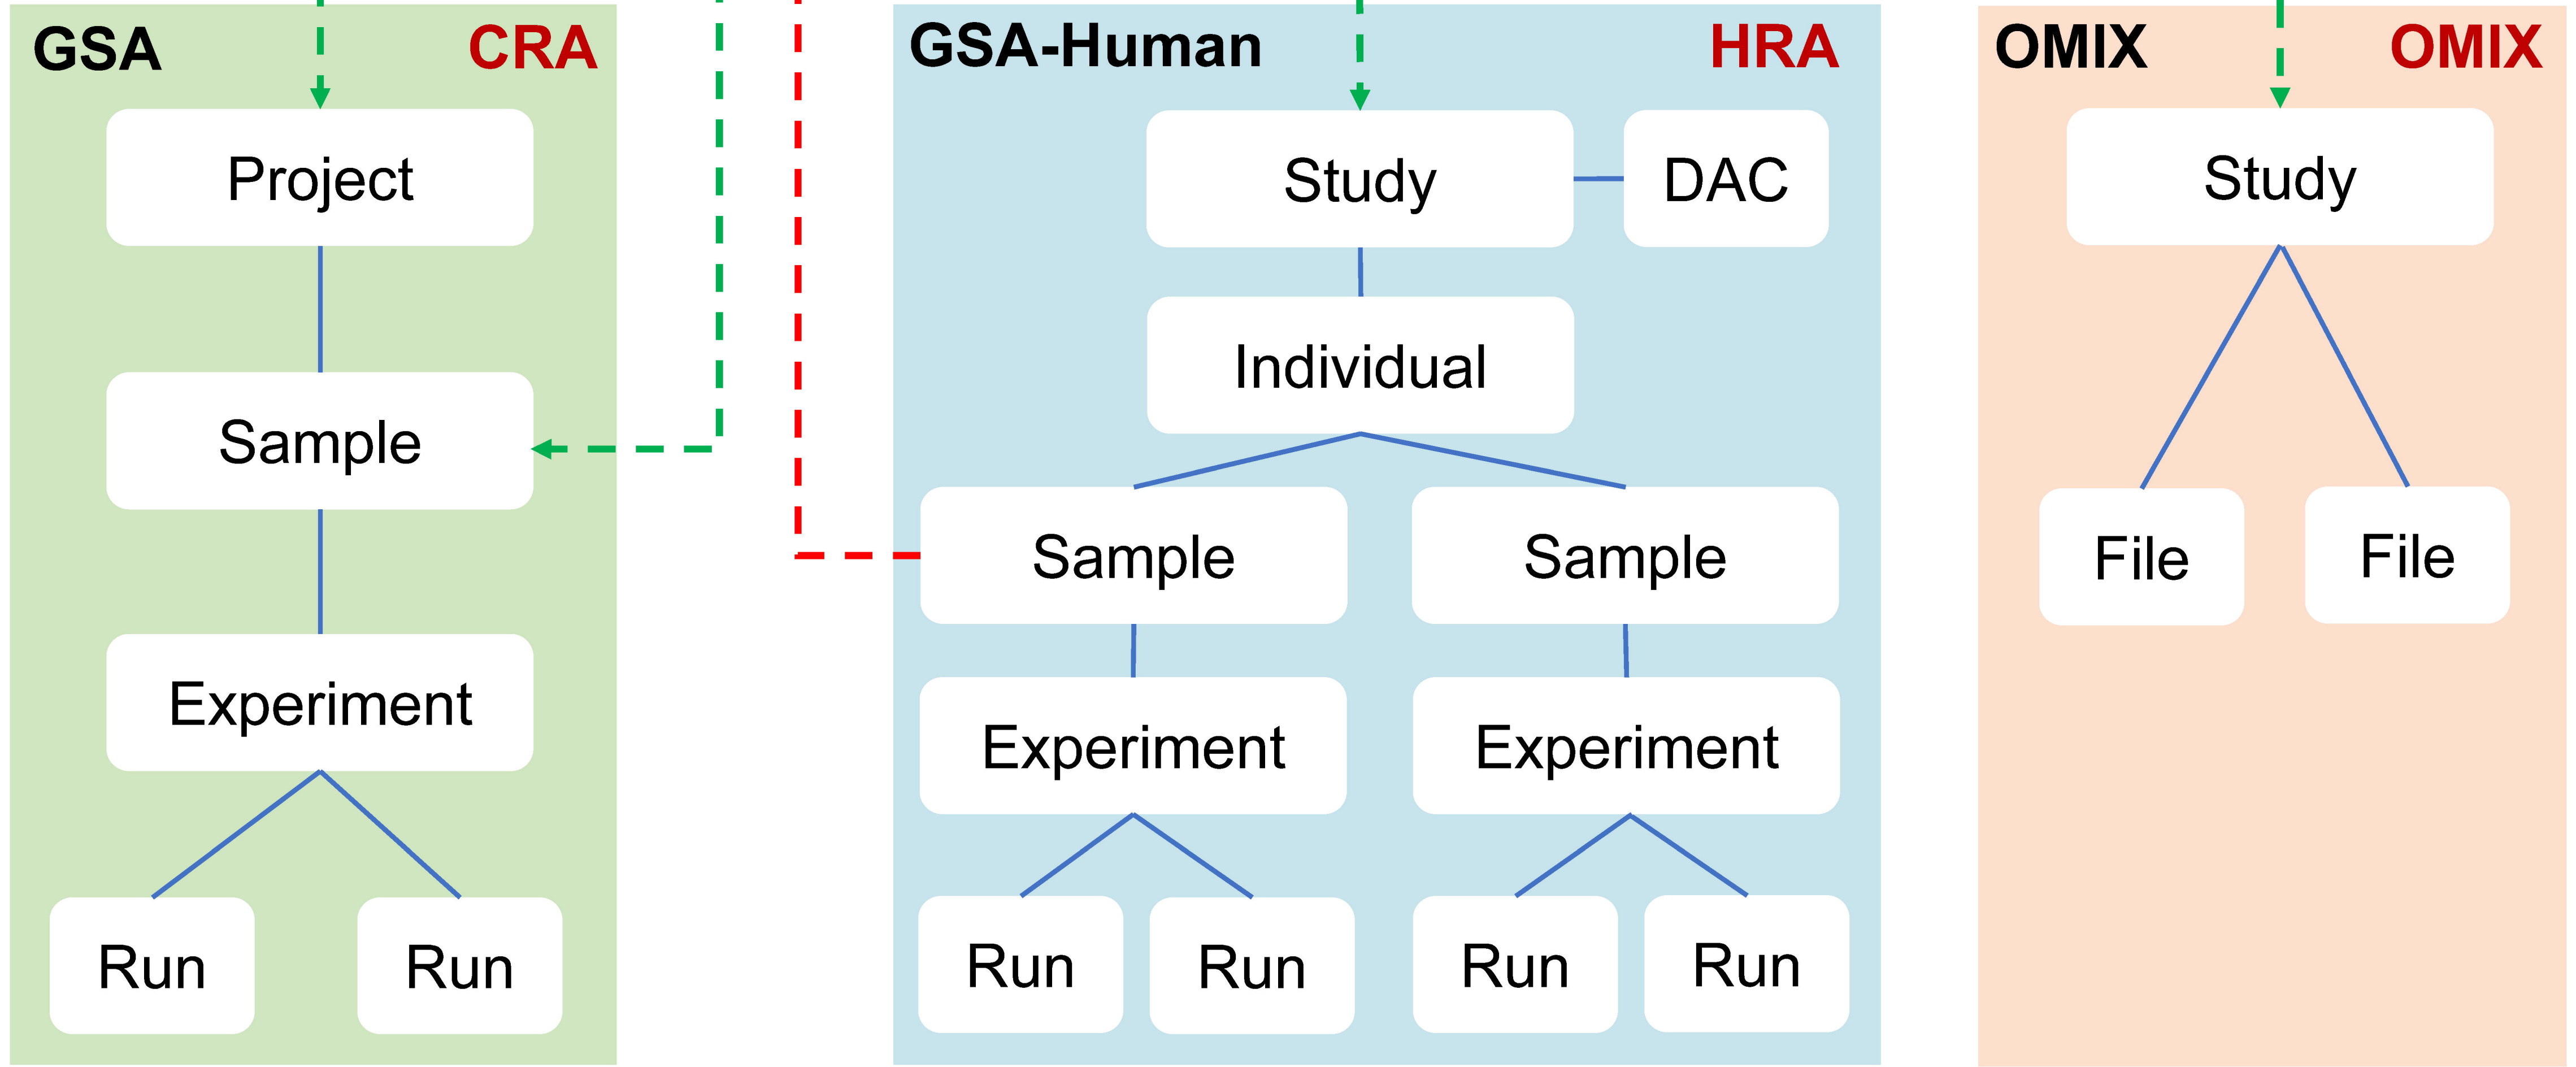

**A**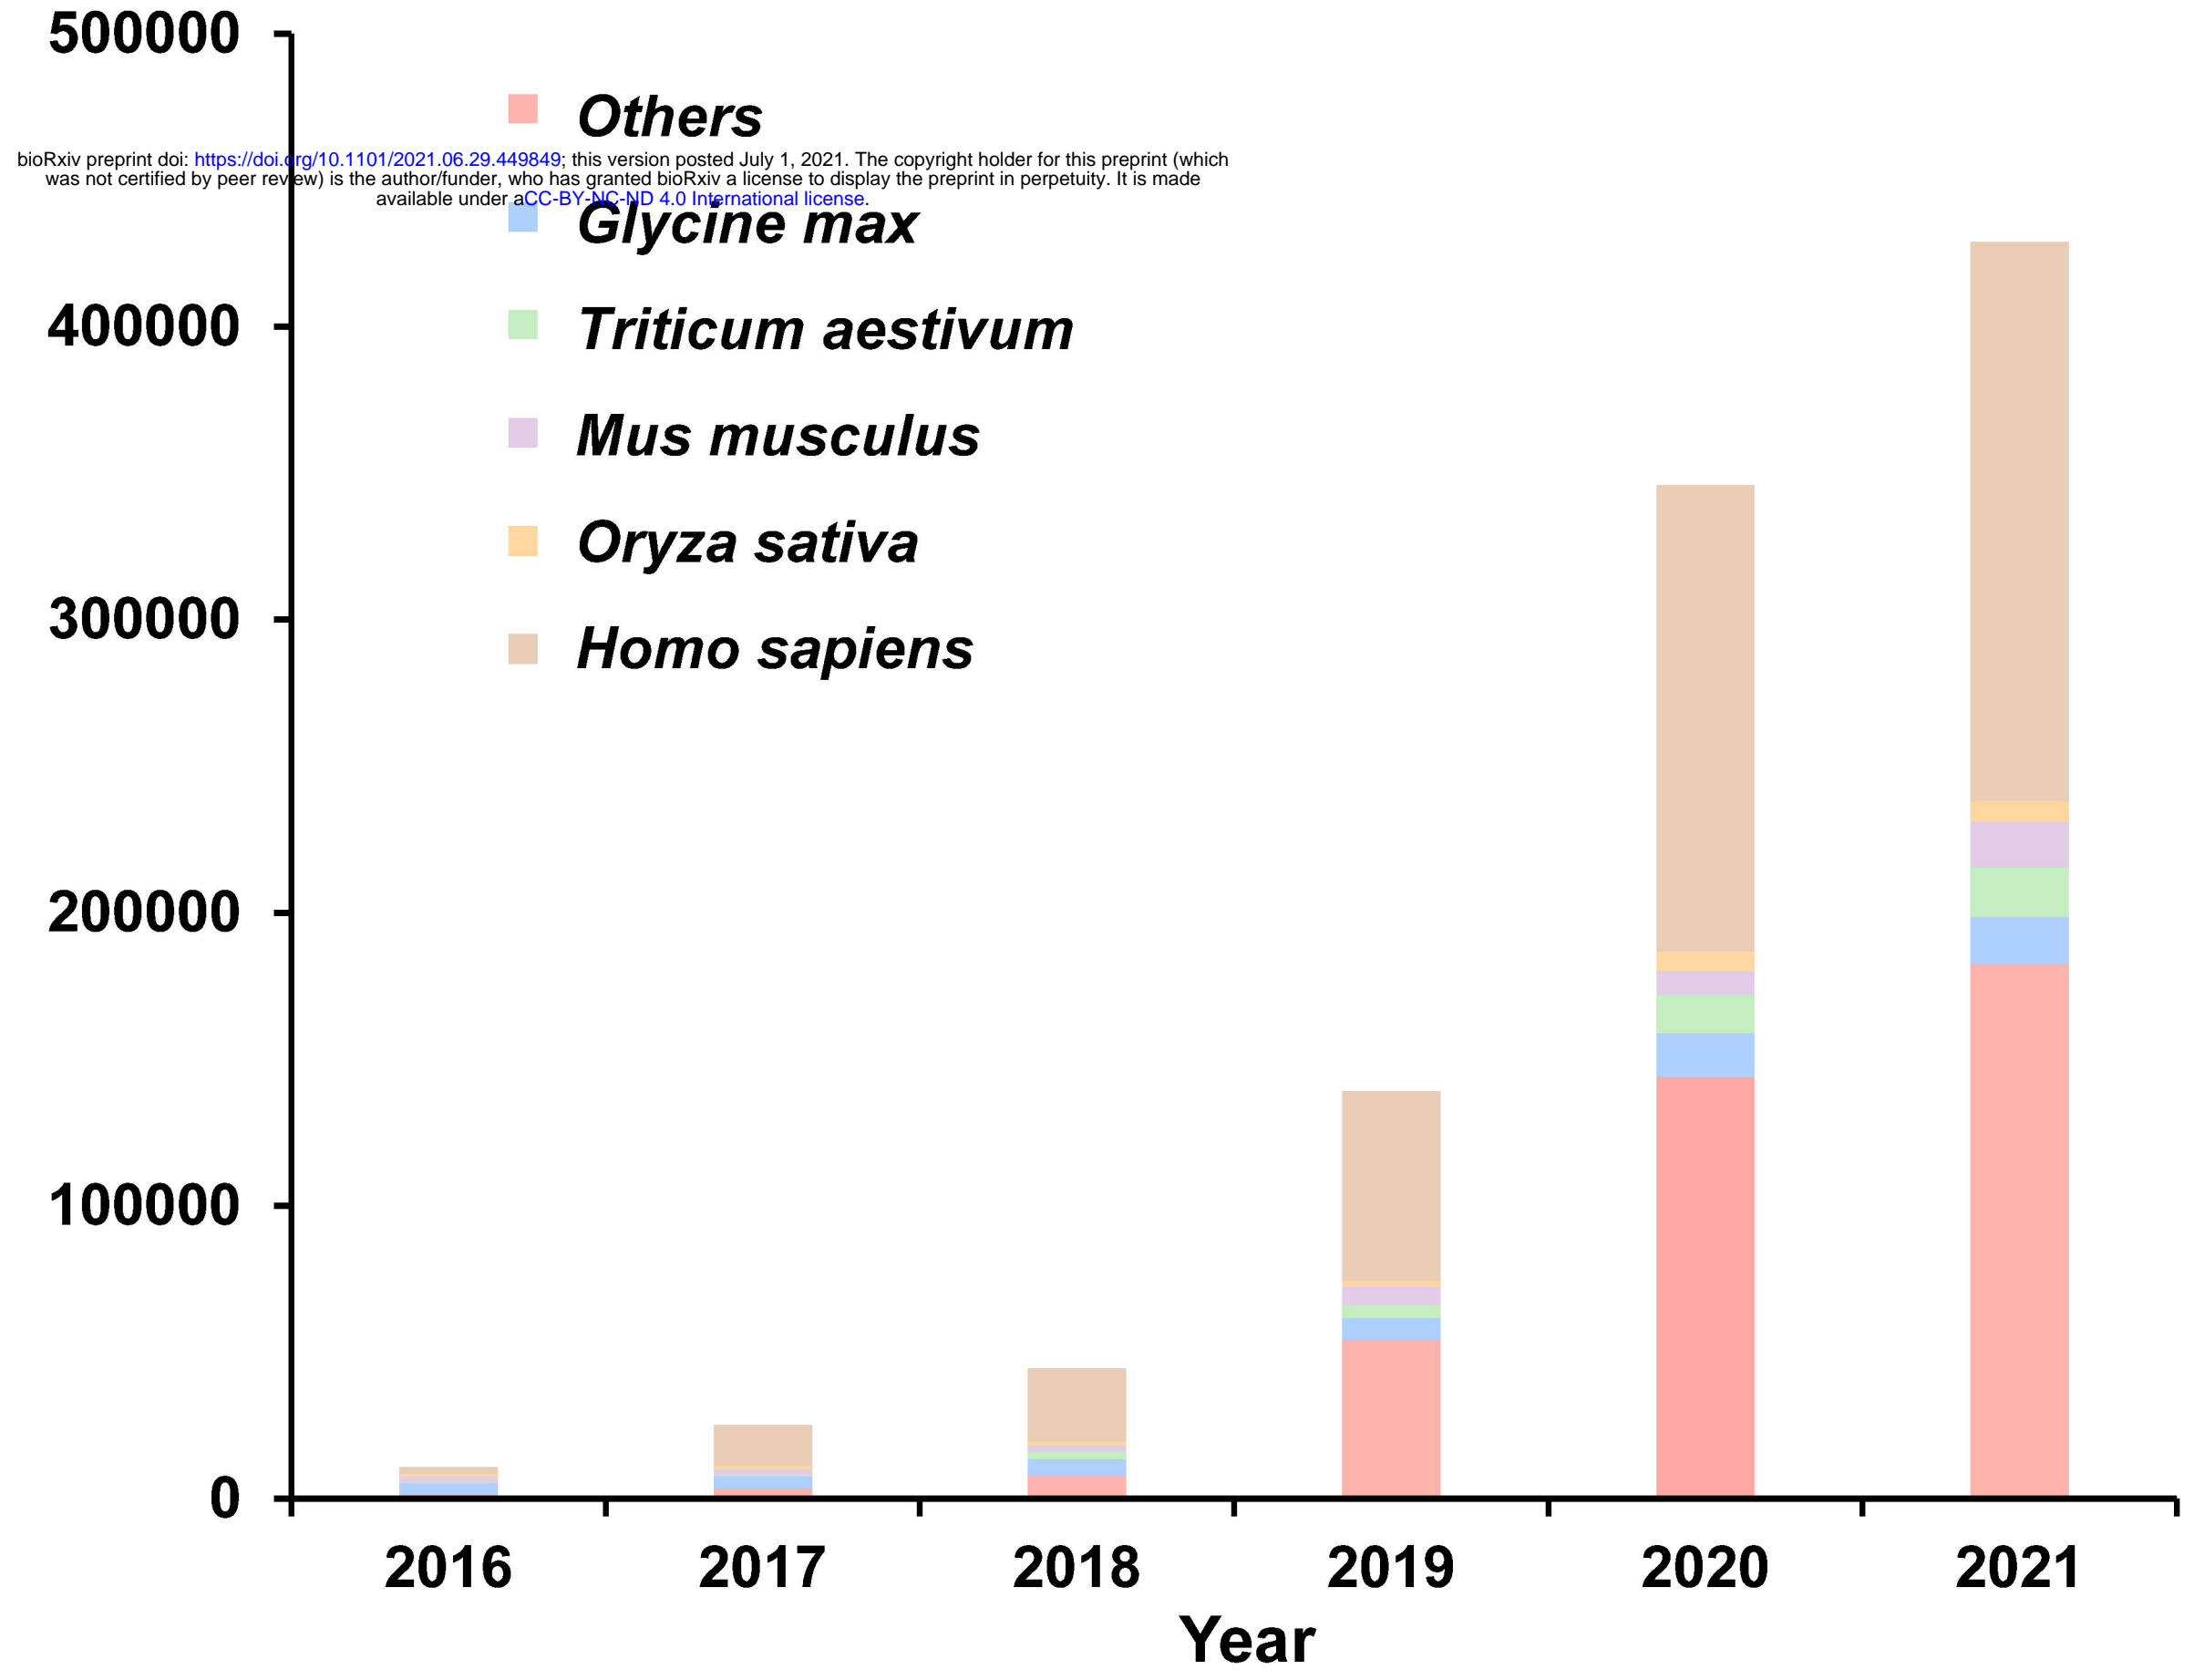**B**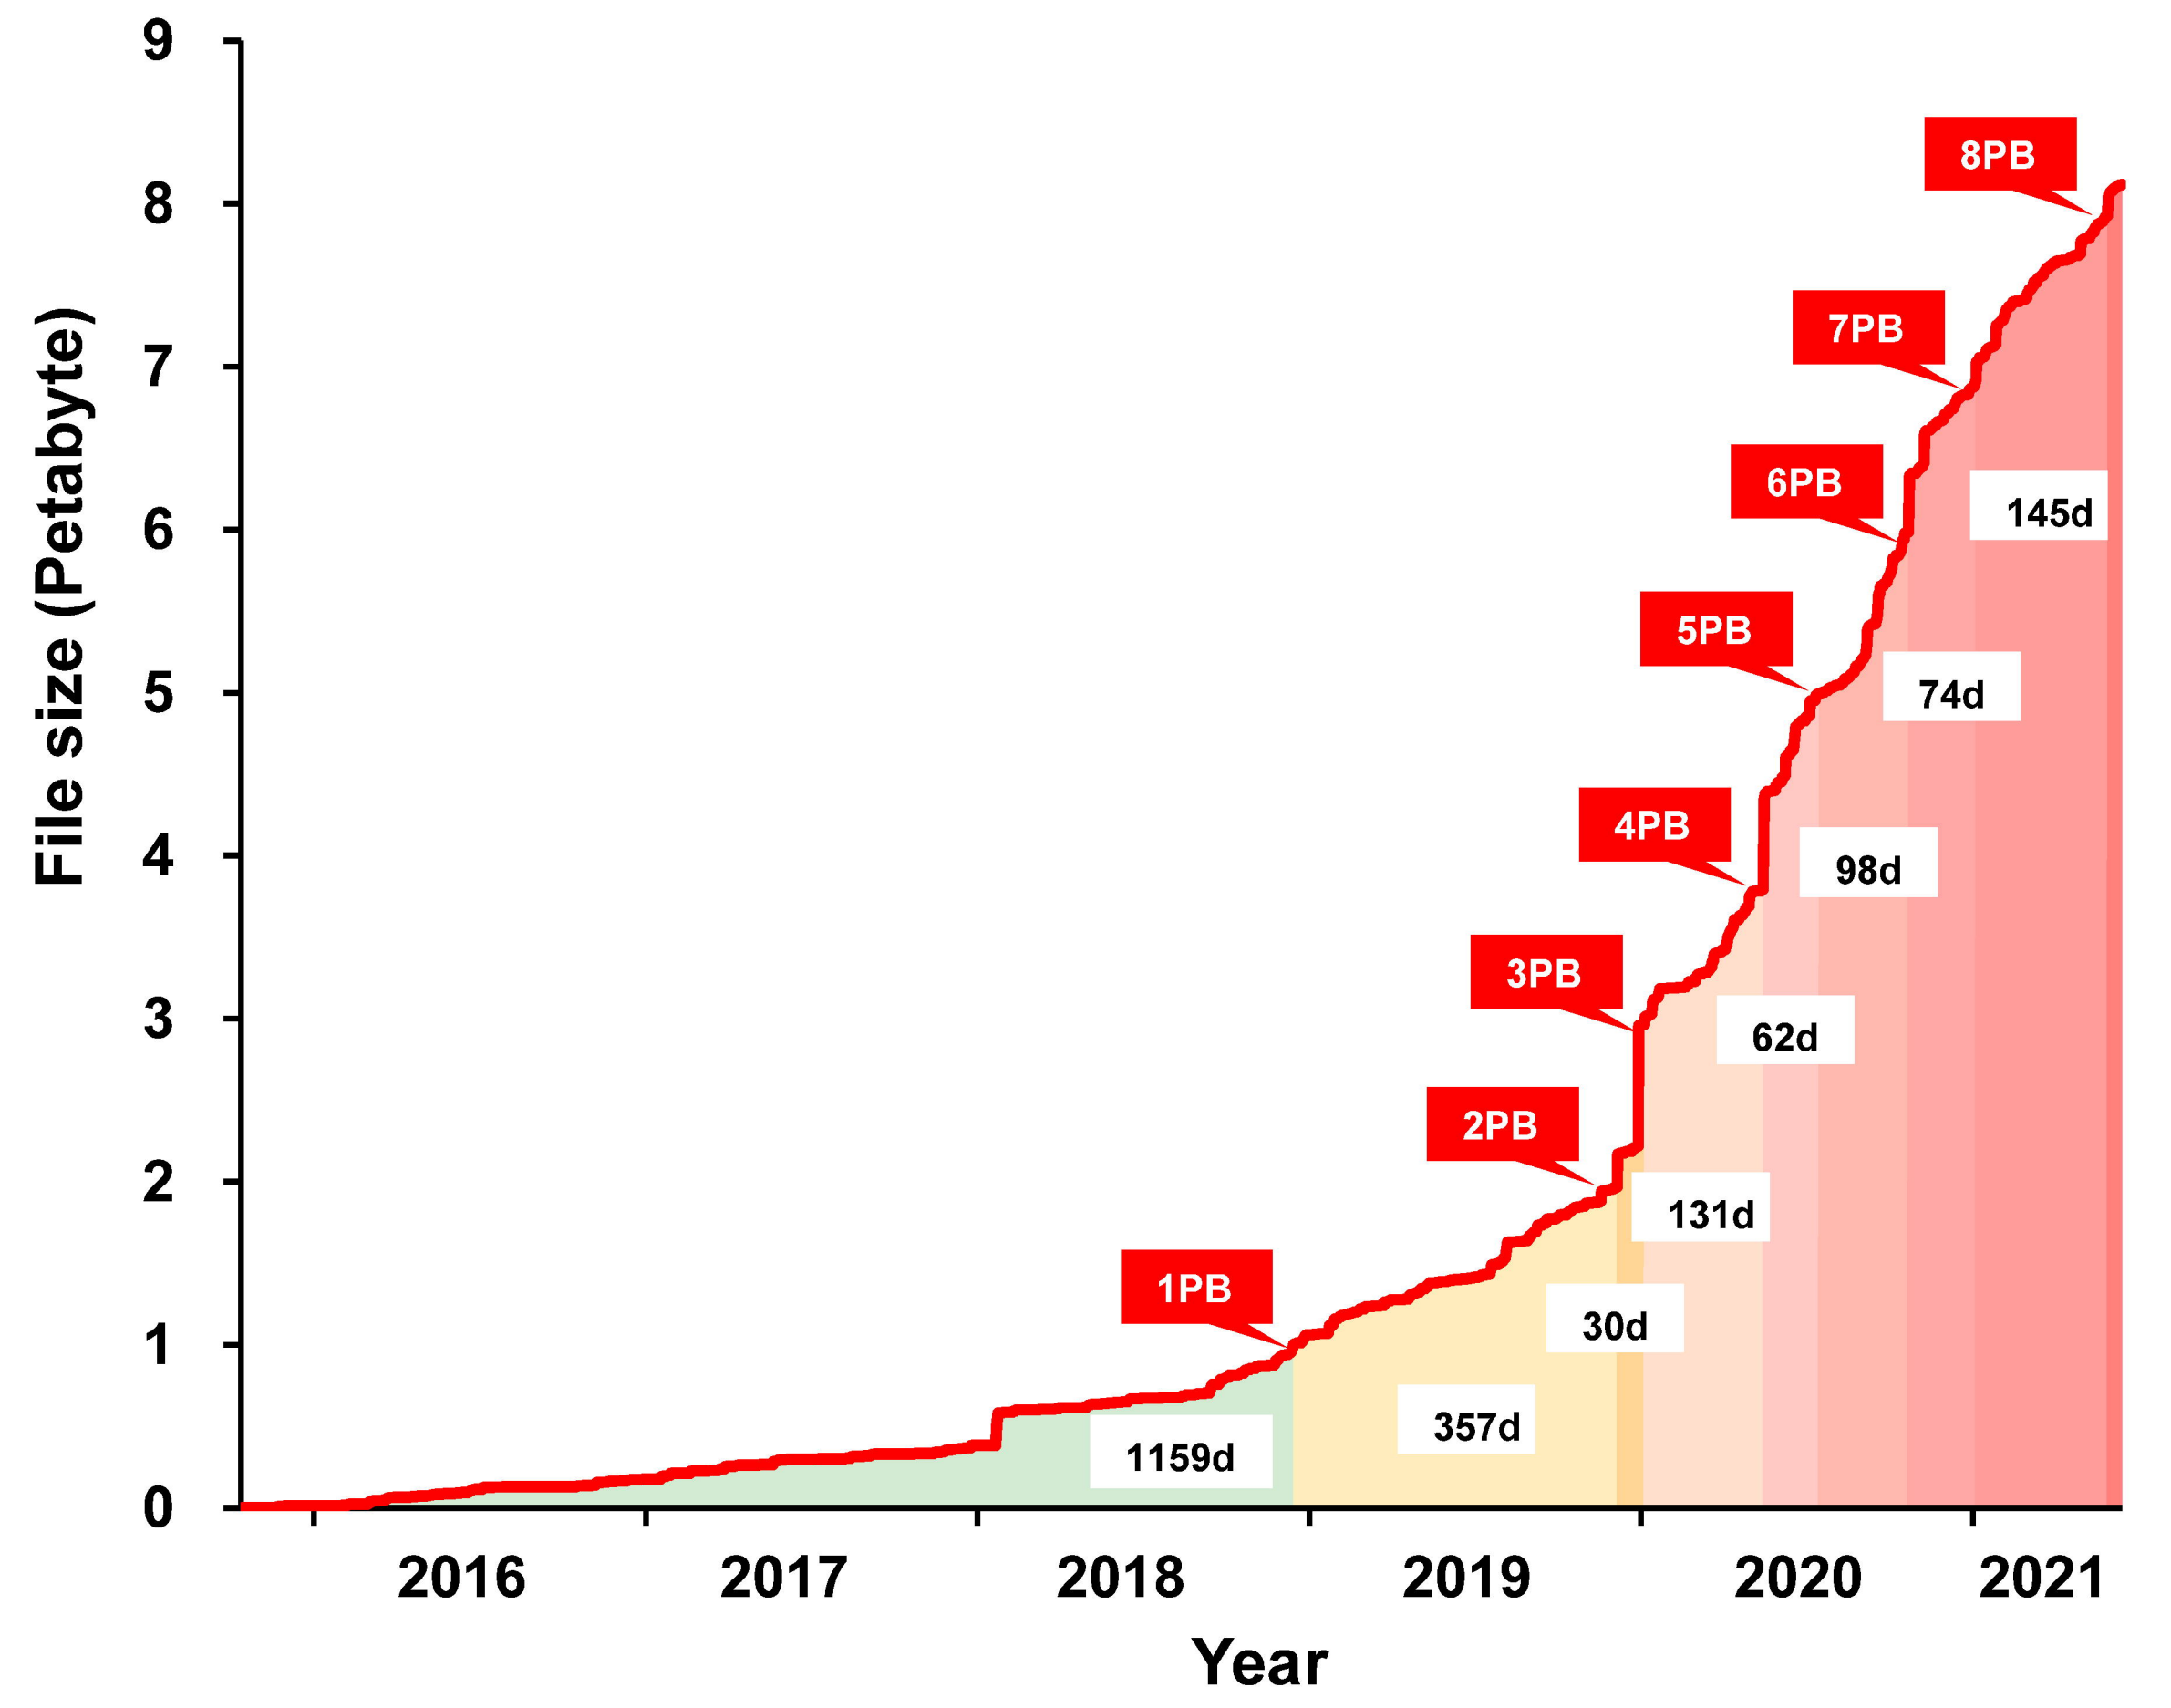

**Table 1 Comparison between GSA in 2017 and the GSA family in 2021**

| <b>Category</b>                           | <b>2017</b> | <b>2021</b>          |
|-------------------------------------------|-------------|----------------------|
| Archival resources                        | GSA         | GSA, GSA-Human, OMIX |
| Number of supported sample types*         | 7           | 11                   |
| Batch submission                          | NA          | Available            |
| Data statistics                           | NA          | Available            |
| Supported languages                       | English     | English, Chinese     |
| Controlled access                         | NA          | Available            |
| Data transfer                             | FTP         | FTP, Aspera          |
| Number of supported sequencing platforms* | 49          | 66                   |
| Number of supported data formats*         | 9           | 13                   |
| Quality control*                          | Metadata    | Metadata, Data       |

\* More details are available at <https://ngdc.cncb.ac.cn/gsa/standards>.

**Table 2 Data items of the GSA family**

| <b>Item*</b>      | <b>GSA</b> | <b>GSA-Human</b> | <b>OMIX</b> | <b>Total</b> |
|-------------------|------------|------------------|-------------|--------------|
| BioProjects       | 2398       | 537              | 83          | 2920         |
| Individuals       | /          | 61,225           | /           | 61,225       |
| BioSamples        | 241,360    | 125,715          | /           | 367,075      |
| Experiments       | 178,670    | 145,655          | /           | 324,325      |
| Runs              | 195,298    | 176,675          | /           | 371,973      |
| File size (Tbyte) | 3545       | 4980             | 0.888       | 8526         |
| Registered users  |            | 4610             |             |              |

\* All statistics were derived from the GSA family as of June 2021.
